# Supplementary material
Source: ML conference proceedings conference paper supplement (https://openaccess.thecvf.com/content/ICCV2025/html/Li_MSA2_Multi-task_Framework_ICCV_2025_paper.html)
Supplement: Supplementary file 1 [file 1096_supp.pdf › 1096_supp.pdf]

# MSA<sup>2</sup>: Multi-task Framework with Structure-aware and Style-adaptive Character Representation for Open-set Chinese Text Recognition

## Supplementary Material

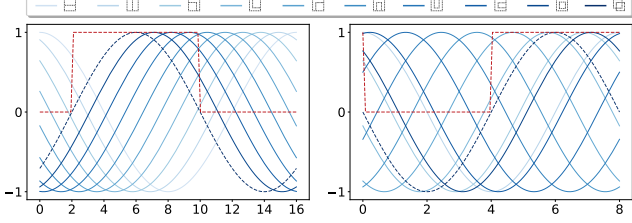

Figure 13. Illustration of the sinusoidal encoding for structures with varying representation spaces, where the red dashed line denotes a type of structure code generated through binarization.

### A. Implement details

**Structure Encoding Algorithm** In existing methods, all structures within a character are uniformly represented using 4-bit binary encoding. In contrast, SACE employs different encoding strategies for structures at varying depth layers to emphasize the distinction between primary and secondary structures, as detailed in Algorithm 1. Notably, SACE presents a sinusoidal encoding algorithm to represent the primary structures. As shown in Figure 13, this algorithm utilizes the phase to describe the structure type and uses the period to control the representation space size. The binarized sinusoidal function is then defined as the structure code. In this way, SACE can generate unique and informative codes of arbitrary length for different structures.

**Network Architecture** For fair comparisons, we consider two configurations of different scales for the recognizer. The first configuration uses ResNet50 [8] as the backbone, paired with a transformer decoder that includes two multi-head attention layers for sequence modeling. In this transformer decoder, the number of attention heads is set to 4, the model dimension is 1024, and attention loss is used as recognition loss.

The second configuration employs ResNet34 as the backbone, along with two BiLSTM [9] or BiGRU [5] layers, each with 512 hidden states, serving as the sequence model. Specifically, for handwritten recognition, we use BiGRU for sequence modeling, while BiLSTM is applied for other scenarios. A CTC decoder is implemented as the sequence decoder described in Equation (3) to align the predictions with the ground-truth labels during training.

For both configurations, we rectify the input images to ensure that text lines are horizontal and remove white padding from the top and bottom of the images to emphasize the text. Additionally, two linear layers followed by

### Algorithm 1 Structure Encoding in SACE

---

```

1: Input: index of nodes:  $i$ , index of structure types:  $s_i \in [0, 1, 2, \dots, 10]$ , max depth of the binary tree:  $D > 1$ .
2: Initialization: structure code  $\mathcal{I}_s = []$ 
3: for  $i \in \{1, 2, \dots, 2 \cdot (D-1) - 1\}$  do
4:    $n_i = \max(16 / (2 \cdot \lfloor \log_2(i) \rfloor), 1)$  # length
5:   if  $s_i = 0$  then # non-structure node
6:      $\mathcal{I}_s^i = \text{zeros}(n_i)$  # zero padding
7:   else
8:     if  $n_i \in [8, 16]$  then
9:        $t = [0, 1, \dots, n_i - 1]$ 
10:       $\mathcal{I}_s^i = \text{binarize}(\cos(32\pi(s_i + t)/n_i \cdot 2))$ 
11:    else if  $n_i = 4$  then # binary encoding
12:       $\mathcal{I}_s^i = \text{list}(\text{map}(\text{'int'}, \text{format}(s_i, \text{'04b'})))$ 
13:    else if  $n_i = 2$  then
14:      if  $s_i \in \text{Composite}$  then  $\mathcal{I}_s^i = [0, 1]$ 
15:      else if  $s_i \in \text{Surround}$  then  $\mathcal{I}_s^i = [1, 0]$ 
16:      else  $\mathcal{I}_s^i = [1, 1]$  # Overlaid
17:    else if  $n_i = 1$  then
18:       $\mathcal{I}_s^i = [1]$ 
19:    end if
20:  end if
21:   $\mathcal{I}_s \leftarrow \text{Concat}(\mathcal{I}_s, \mathcal{I}_s^i)$  # concatenating
22: end for
23: Output: structure code  $\mathcal{I}_s$ 

```

---

LeakyReLU activation are used as the linguistics and glyph decoder. Notably, the first configuration is only used for regular CTR evaluation, *i.e.*, MSA<sup>2</sup>,<sup>†</sup> reported in Table 1.

**Description of Glyph Forms** In this work, we consider 10 different types of glyphs: cursive (T1), artistic (T2), handwritten (T3), SimHei (*i.e.*, bold) (T4), SimSun (*i.e.*, SongTi) (T5), FangSong (T6), round (T7), KaiTi (T8), LiShu (T9), and others (T10). To enhance the diversity of glyph styles, we collect 7 variants for each type, as presented in Table 8. The glyph from each variant is rendered on a black background with a size of  $96 \times 96$ . Notably, some complex Chinese characters cannot be accurately rendered using these specific forms. Therefore, to ensure the robustness of the glyph representations generated through GCCL, only glyphs that can be rendered with these forms are considered in calculating the pseudo-representation, as in Equation (8).

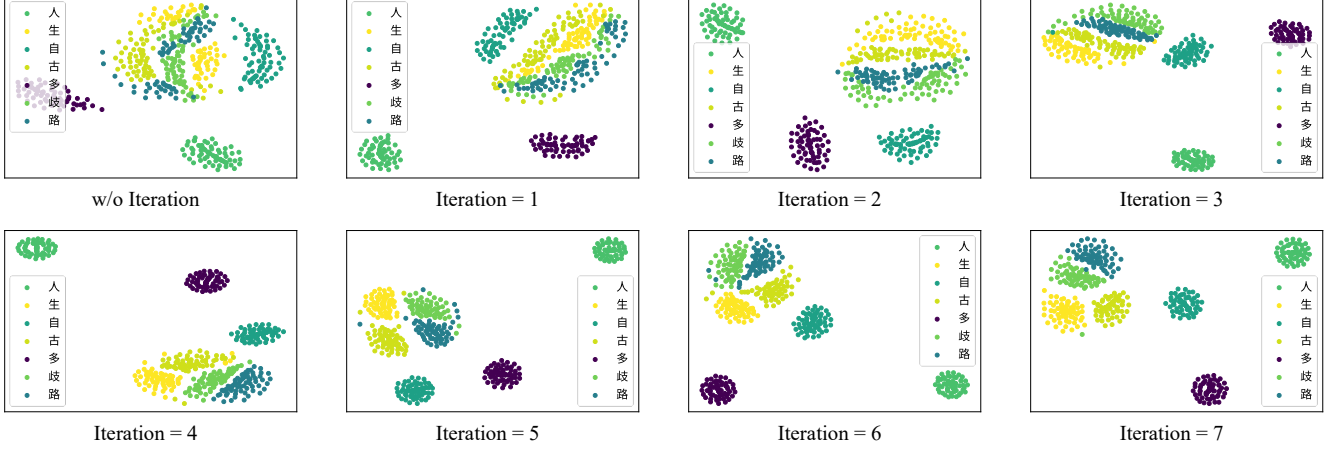

Figure 14. Glyph embedding distribution visualization with varying iteration of the GCCL.

## B. Ablation Study

In this section, we present two additional ablation experiments, focusing on the structure encoding algorithm and the radical codes to validate their effectiveness.

**Influence of Structures Encoding Algorithm** To validate the effectiveness of the introduced sinusoidal encoding algorithm, we compare it with two widely used encoding algorithms: binary encoding and random multi-hot encoding. As shown in Table 6, our proposed sinusoidal encoding algorithm achieves the best result. This is likely due to the fact that random multi-hot encoding produces complex patterns, making predictions by the linguistic decoder more challenging. Additionally, when the representation space is much larger than  $\lceil \log_2(10) \rceil$ , the binary encoding generates sparse codes containing many zero-padding bits, which negatively impacts their expressive ability.

**Influence of Radical Code** We explore various combinations of the number of encoded radicals ( $R$ ) and encoding length ( $L_R$ ). Additionally, we generate a random radical code of equal length for each character as a baseline, which cannot express any radical information. As shown in Table 7, random encoding leads to a significant decrease in recognition performance compared to encoding based on character radicals, highlighting the importance of radicals for recognition. Furthermore, we observe that preserving too few radicals (e.g.,  $R = 12$ ) substantially degrades the recognition performance of the CTR model due to excessive loss of radical information. Meanwhile, since most characters do not contain many radicals, considering too many radicals increases ineffective padding bits within the linguistic representation, thereby decreasing recognition performance (as discussed in Section 4.5). Moreover, shorter encoding lengths (e.g.,  $L_R = 36$ ) slightly decline the recognition performance due to their limited expressive ability. As the encoding length increases, recognition performance

| Encoding Strategy         | AR           | RR           |
|---------------------------|--------------|--------------|
| Binary Encoding           | 97.07        | 94.78        |
| Random multi-hot Encoding | 97.22        | 94.90        |
| Sinusoidal Encoding       | <b>97.35</b> | <b>95.12</b> |

Table 6. Ablation study on encoding algorithm of structures in terms of accurate rate (%) (AR) and recall rate (%) (RR).

| $R$         | $L_R$ | AR           | RR           |
|-------------|-------|--------------|--------------|
| Random Code |       | 95.81        | 94.65        |
| 16          | 36    | 97.12        | 94.92        |
| 16          | 48    | 97.25        | 95.08        |
| 16          | 60    | <b>97.35</b> | <b>95.12</b> |
| 16          | 72    | 97.33        | 95.11        |
| 12          | 60    | 97.04        | 94.87        |
| 20          | 60    | 97.26        | 95.04        |

Table 7. Ablation study on the numbers of encoded radical nodes, i.e.,  $R$  and the length of the radical codes, i.e.,  $L_R$  in terms of accurate rate (%) (AR) and recall rate (%) (RR).

gradually improves and approaches saturation. Ultimately, we selected  $R = 16$  and  $L_R = 60$  as the standard settings to balance performance and computational efficiency.

## C. Visualization

To further visualize the effectiveness of GCCL, we sample seven characters and visualize their glyph embedding distribution with different iterations in a 2-D space using t-SNE, where each character class is represented by a distinct color. As shown in Figure 14, as iterations progress, the glyph embeddings become increasingly discriminative, and the number of outliers decreases. Consequently, the pseudo-representations derived from these embeddings become more representative, strongly demonstrating the effectiveness of GCCL.

| Type | No. | Forms   | Samples | Type | No. | Forms   | Samples |
|------|-----|---------|---------|------|-----|---------|---------|
| T1   | 1   | F101255 | 欲把西湖比西子 | T6   | 36  | F101228 | 欲把西湖比西子 |
|      | 2   | F103112 | 欲把西湖比西子 |      | 37  | F101170 | 欲把西湖比西子 |
|      | 3   | F101104 | 欲把西湖比西子 |      | 38  | F101282 | 欲把西湖比西子 |
|      | 4   | F101140 | 欲把西湖比西子 |      | 39  | F100714 | 欲把西湖比西子 |
|      | 5   | F100582 | 欲把西湖比西子 |      | 40  | F100568 | 欲把西湖比西子 |
|      | 6   | F102844 | 欲把西湖比西子 |      | 41  | F103164 | 欲把西湖比西子 |
|      | 7   | F102836 | 欲把西湖比西子 |      | 42  | F100333 | 欲把西湖比西子 |
| T2   | 8   | F101144 | 欲把西湖比西子 | T7   | 43  | F102457 | 欲把西湖比西子 |
|      | 9   | F101245 | 欲把西湖比西子 |      | 44  | F100573 | 欲把西湖比西子 |
|      | 10  | F102391 | 欲把西湖比西子 |      | 45  | F101295 | 欲把西湖比西子 |
|      | 11  | F101274 | 欲把西湖比西子 |      | 46  | F101112 | 欲把西湖比西子 |
|      | 12  | F100099 | 欲把西湖比西子 |      | 47  | F102530 | 欲把西湖比西子 |
|      | 13  | F100583 | 欲把西湖比西子 |      | 48  | F101207 | 欲把西湖比西子 |
|      | 14  | F102804 | 欲把西湖比西子 |      | 49  | F101213 | 欲把西湖比西子 |
| T3   | 15  | F102427 | 欲把西湖比西子 | T8   | 50  | F101103 | 欲把西湖比西子 |
|      | 16  | F100542 | 欲把西湖比西子 |      | 51  | F102338 | 欲把西湖比西子 |
|      | 17  | F102840 | 欲把西湖比西子 |      | 52  | F102820 | 欲把西湖比西子 |
|      | 18  | F101155 | 欲把西湖比西子 |      | 53  | F102862 | 欲把西湖比西子 |
|      | 19  | F100403 | 欲把西湖比西子 |      | 54  | F103216 | 欲把西湖比西子 |
|      | 20  | F100413 | 欲把西湖比西子 |      | 55  | F101154 | 欲把西湖比西子 |
|      | 21  | F101100 | 欲把西湖比西子 |      | 56  | F102942 | 欲把西湖比西子 |
| T4   | 22  | F103287 | 欲把西湖比西子 | T9   | 57  | F102819 | 欲把西湖比西子 |
|      | 23  | F101216 | 欲把西湖比西子 |      | 58  | F103225 | 欲把西湖比西子 |
|      | 24  | F101105 | 欲把西湖比西子 |      | 59  | F102976 | 欲把西湖比西子 |
|      | 25  | F101279 | 欲把西湖比西子 |      | 60  | F101260 | 欲把西湖比西子 |
|      | 26  | F103260 | 欲把西湖比西子 |      | 61  | F103121 | 欲把西湖比西子 |
|      | 27  | F100706 | 欲把西湖比西子 |      | 62  | F102403 | 欲把西湖比西子 |
|      | 28  | F101261 | 欲把西湖比西子 |      | 63  | F101259 | 欲把西湖比西子 |
| T5   | 29  | F101253 | 欲把西湖比西子 | T10  | 64  | F100587 | 欲把西湖比西子 |
|      | 30  | F101190 | 欲把西湖比西子 |      | 65  | F103263 | 欲把西湖比西子 |
|      | 31  | F102806 | 欲把西湖比西子 |      | 66  | F100170 | 欲把西湖比西子 |
|      | 32  | F101183 | 欲把西湖比西子 |      | 67  | F101133 | 欲把西湖比西子 |
|      | 33  | F100698 | 欲把西湖比西子 |      | 68  | F100001 | 欲把西湖比西子 |
|      | 34  | F102323 | 欲把西湖比西子 |      | 69  | F102398 | 欲把西湖比西子 |
|      | 35  | F102324 | 欲把西湖比西子 |      | 70  | F102807 | 欲把西湖比西子 |

Table 8. Visualizations of the 70 forms of glyphs employed in this work through the ancient Chinese poem ‘欲把西湖比西子’. The font files are available at: <https://www.51miz.com/fonts/>.
